# Supplementary material
Source: publisher figshare collection journal article supplement (https://acs.figshare.com/ndownloader/files/4614415)
Supplement: Supplementary file 1 [file 4614415]

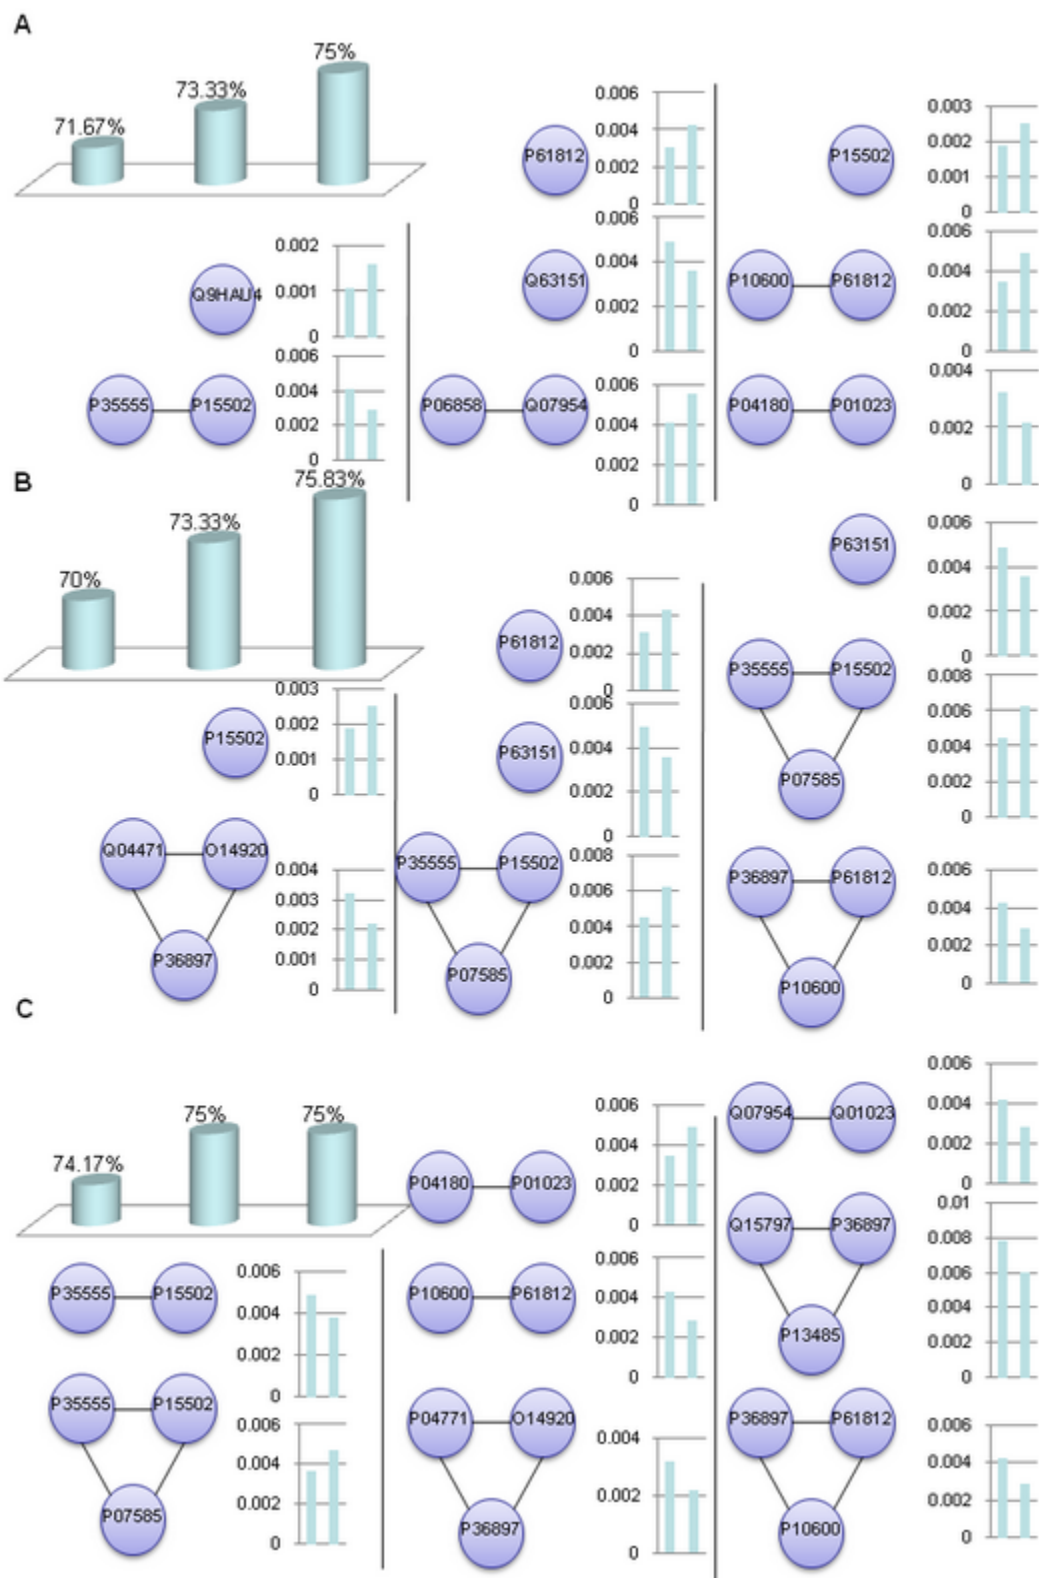

Supplementary Figure 1. The pair biomarker P10600-P61812 appears in Table 1 for the pair biomarker identification but it doesn't appear in Table 2. In this figure, the classification accuracies are shown for the involvement of pair biomarker P10600-P61812 in the multi-type biomarker identification.

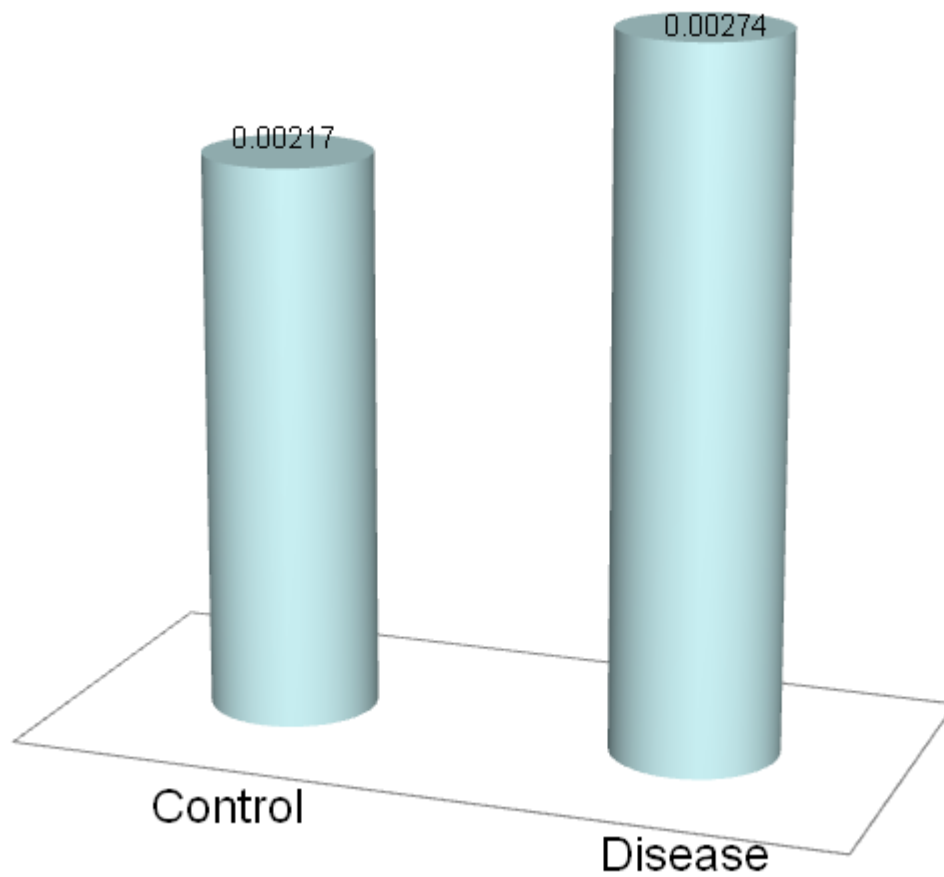

Supplementary Figure 2. The  $P$ -value for MPO is less than 0.01 (Student's  $t$  test).
